# Supplementary material
Source: MDPI journal article supplement (https://www.mdpi.com/2073-445X/4/4/979)
Supplement: s1 [file s1]

**OPEN ACCESS**

***land***

**ISSN 2073-445X**

www.mdpi.com/journal/land/

Supplementary Information

Why Don’t More Farmers Go Organic? Using A
Stakeholder-Informed Exploratory Agent-Based Model to Represent the Dynamics of Farming Practices in the Philippines

Laura Schmitt Olabisi 1,*, Ryan Qi Wang 2, Arika Ligmann-Zielinska 3

1 Department of Community Sustainability and Environmental Science & Policy Program, Michigan State University, 151 Natural Resources Building, 480 Wilson Road, East Lansing, MI 48824, USA

2 Department of Civil and Environmental Engineering, Virginia Tech, 113 Patton Hall (0105), Blacksburg, VA 24061, USA; E-Mail: wangqi@vt.edu

3 Department of Geography and Environmental Science & Policy Program, Michigan State University, Room 121 Geography Building, 673 Auditorium Rd., East Lansing, MI 48824, USA;
E-Mail: ligmannz@msu.edu

***** Author to whom correspondence should be addressed; E-Mail: schmi420@msu.edu;
Tel.: +1-517-432-4128.

This document describes an agent-based model built in Repast Simphony 2.0 to assist the study of organic farming adoption among smallholders growing rice in the upland Philippines. The model incorporates empirical data collected in Canlaon, Negros Oriental, Philippines between 2010 and 2011. We follow the ODD protocol to describe the model [1,2]

1. Overview

1.1. Purpose

The model proposes a framework to simulate the smallholder farmers’ social network structures and decision making procedures to implement organic techniques in rice paddy systems. The diversity of individual decisions and behaviors will help explore the complexity of such phenomenon.

1.2. State Variables and Scales

1.2.1. Entities

The model entities are the individuals of an artificial farmer population. Although all agents share the same attributes and decision-making processes, the different values of their attributes determine individuals choosing different farming methods. Figure 1 shows the decision-making process and behaviors for each farmer agent. Each individual has multiple attributes which can be classed into three categories: household attributes, economic attributes, and social attributes. There are at most 2500 individuals in the model.


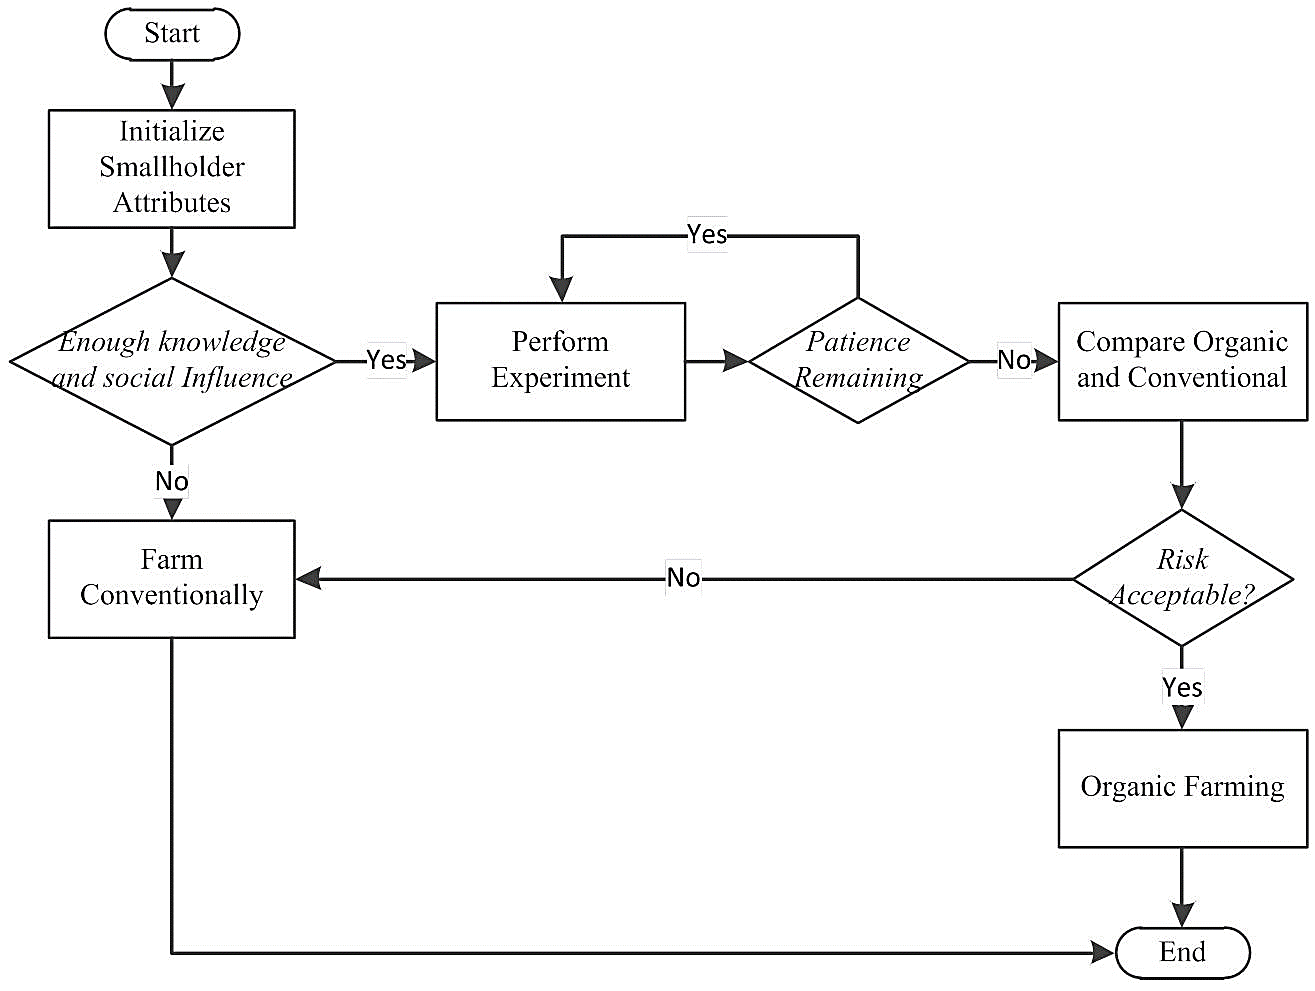


**Figure S1.** Decision-making and behavior model for farmer agent.

1.2.2. Environment

The agents reside in a virtual environment which structures the agents in two ways. First, a virtual grid space is created with the dimension of 100 × 100. The grid thus divides the environment into 10,000 cell. Each individual occupies one cell and each cell can only be occupied by one individual. Second, the individuals are connected by a social network structure. We constructed a stylized social network for the farmer agents to represent the ways in which farmers influence their social connections and share information about organic farming techniques. The structure of the network was informed by qualitative data (*i.e.*, how farmers described receiving information). Any two individuals are connected to each other if the social distance is within their social reaches, and one’s decisions are influenced by its social connections.

1.3. Process Overview and Scheduling

The simulation runs for 100 cycles. Each cycle is one rice season, and there are three rice seasons per year. Therefore, the model has run for 100 rice seasons, or approximately 33 years.

Each cycle has two steps: the first step is “before each farming season”, and the second step is “during each farming season”. During the first step, each individual evaluates both organic farming method and conventional farming method based on the historical data, economic situation in the household, and perceived risks. The model loops through all the individuals and each individual makes a decision. In the second step, the model loops through each individual again and each one performs based on the decision. The result of each individual is recorded and used to support decision making in the next cycle.

2. Design Concepts

2.1. Basic Concepts

Our model examines the detailed attributes of smallholder farmers in Philippines from three aspects and how these attributes can influence individuals and population behaviors. The three aspects of attributes are household attributes, economic attributes, and social attributes. We observe under what circumstances organic farming can become a dominant farming method in smallholder farmers in Philippines.

2.2. Emergence

The emergence from this model is the adoption of organic farming in a population of smallholder farmers. After we randomly introduce organic farming into certain individuals, the adoption pattern is emergent through the social networks among agents.

2.3. Adaption

The model simulates how farmers adapt to the changes of farming method. Farmer agents adapt to the peer influences from their connections who experiment on or change their farming method to organic farming.

2.4. Fitness

At the individual level, fitness is measured by the profitability of farming in each season.

2.5. Interaction

Agents interact through the social network structure. Each individual’s decision is influenced by its social connections.

2.6. Sensing

Each agent only has incomplete information of other agents. An individual only knows the farming methods of its social connections.

2.7. Observation

Observations include graphical display of adoption situations in the social networks and metrics measuring adoption rates and number of agents that are forced to leave the market.

3. Details

3.1. Model Initialization

To initialize the model, we set up the network structure by applying Hamil and Gilbert’s methods (2009) [3]. The values of the social attributes are initialized following the distributions mentioned above. After the attributes are set, agents are connected based on the values of social reach. Any two agents ***a*** and ***b*** are connected if Equation (S1) is satisfied.

|  | (S1) |
| --- | --- |

Lastly, 1/700 of all the agents, so about 3 or 4 of them, are seeded as “early adopters” of organic farming methods.

3.2. Agent Attributes

3.2.1. Household Attributes

Household attributes include *land area*, *number of household members*, *the number of labors* within these members, *animal availability*, *water buffalo availability*, and *patience*. The *land areas* of the 2500 agents follow a uniform distribution ranging from 0.25 to 1.5 hectares based on the empirical data. *The number of labor* is 0, 1, 2 or 3 units assigned following a discrete uniform distribution. According to demographic statistics in the Philippines [4], the average household size was 5 members in 2000. Research conducted by the East-West Center [5] shows that average family size in Philippines is decreasing, dropping from 5.53 in 1990 to 3.5 in 2030. Therefore, in the model, *the number of household members* is assumed to range from 2.5 to 3.5 times of the number of available labor, or roughly 4.5 members per household on average.

*Animal availability* decides if the farmer needs organic fertilizer or not. We assume that only 30 percent of farmers own enough animals to generate a sufficient supply of nutrients for their farms through manure (this is represented as *animal availability* = true). Water buffalo is extra labor. We assume that only 10 percent of the farmers have water buffalo (*water buffalo availability* = true). Since they are only used for plowing (and not weeding or other tasks), each water buffalo is equivalent to half a human labor unit. Patience is the last household attribute of the farmer agents. *Patience* refers to the number of seasons a farmer agent chooses to continue the experiment comparing organic to conventional methods before selecting one. The value of *patience* follows a discrete uniform distribution between 7 and 15.

3.2.2. Economic Attributes

Agents use economic attributes to make economic decisions. The first one is *risk* *attitude*, which is uniformly distributed from 0 to 1. The larger the number, the more the agent can tolerate risks in decision-making. The second attribute is *labor cost*, which represents how much a farmer agent needs to pay for additional labor, if needed.

Social attributes define a farmer’s social relations with other farmers in the area and the social influence attributed to his/her networks. The first attribute is *social reach*. Since all agents are smallholders, we assume they are socially “equal”, and the value of every agent’s social reach is 5, representing the maximum social distance one can connect to other agents. The other attribute is *influence threshold*. This attribute defines the accumulative amount of influence in need before one farmer changes his/her decisions or behaviors. The value of the attribute discretely ranges between 1 and 5 following a uniform distribution.

3.2.3. Social Attributes

The farmer agents were assigned values for “social reach”, the unitless maximum distance between connected farmers (*i.e.*, the extent of influence). It represents the farmer’s social influence on his/her networks. The values of social reach were initially set at 5, and then drawn from a uniform distribution during our computational experiment of sensitivity analysis, because we did not collect information on the structure of the social network at the field site [[45](#_ENREF_45)]. Farmer agents were initially randomly distributed in unitless social space. Any two farmers within each other’s social reach were connected by a link. Each link creates a dyad and each farmer in the dyad is a social connection to the other. These links were the channels through which the model passed information about organic methods; farmers could not experiment with organic techniques unless they were connected to a farmer who already used them.

3.3. Model Steps

3.3.1. Before Each Farming Season

After the model has been initialized, each of the agents needs to first make a decision if he/she wants to conduct experiment. The experiment requires the farmer dividing his/her land into two equal parts and using organic techniques on half of the land and conventional techniques on the other half. The farmer agent performs this experiment if the following criteria are met: (1) he/she is connected to some farmer agents who are using organic techniques; (2) in one’s social connection, the number of agents who are conducting an organic farming experiment is more than the value of his/her influence threshold.

After the agent has conducted the experiment, he/she will then choose either conventional farming techniques or organic farming techniques. To make such a choice, the agent will compare the net profit from the two alternatives. First, he/she estimates the costs of conventional farming. We assume that one person can farm 0.25 ha. Equation (S2) determines if a household needed to hire extra labor and how many labors were in need (rounding to the ceiling):

|  | (S2) |
| --- | --- |

If the number is less than 0, meaning the household has more labor than it needs, the number is set at 0. Equation (S3) then calculates the labor cost for conventional farming:

|  | (S3) |
| --- | --- |

where the previous labor cost is the average number of the last 3 seasons.

The second cost category for a conventional farmer is chemical fertilizer. Based on the data collected from Negros Orieintal province [6], roughly 4.5 bags of chemical fertilizer is required for one hectare of land (Table S1). The amounts of different fertilizers, which represent different concentrations of nitrogen, phosphorus, and potassium, are used in the province in a ratio of 4:1:1:3 (Urea:Ammonsul:Ammophos:Complete). We assume that nitrogen is the limiting nutrient in this farming system. So for one hectare, we assume that 2 bags of Urea, 0.5 bags of Ammosul, 0.5 bags of Ammophos, and 1.5 bags of Complete are applied. The total Nitrogen content of these chemical fertilizers is about 64.75 kilograms.

**Table S1.** Quantity of fertilizer application.

|  | **Total Quantity Applied (bag)** | **Urea (bag)** | **Ammosul (bag)** | **Ammophos (bag)** | **Complete (bag)** |
| --- | --- | --- | --- | --- | --- |
| 2003 | 4.6 | 2.04 | 0.43 | 0.58 | 1.45 |
| 2004 | 4.68 | 2.02 | 0.44 | 0.64 | 1.51 |
| 2005 | 4.62 | 2.03 | 0.44 | 0.63 | 1.41 |
| 2006 | 4.76 | 1.99 | 0.47 | 0.72 | 1.48 |
| 2007 | 4.75 | 2.01 | 0.52 | 0.64 | 1.48 |
| 2008 | 4.16 | 1.86 | 0.51 | 0.45 | 1.25 |
| 2009 | 4.43 | 2.07 | 0.46 | 0.55 | 1.34 |
| 2010 | 4.58 | 2.12 | 0.51 | 0.53 | 1.42 |

Also based on data from Negros Oriental province [6], prices for different fertilizers are listed in Table S2. Based on the data, the price of Nitrogen is 85.77 pesos per kilogram.

**Table S2.** Price of different fertilizer (PhP per bag).

|  | **Ammophos (16-20-0)** | **Ammosul (21-0-0)** | **Complete (14-14-14)** | **Urea (45-0-0)** |
| --- | --- | --- | --- | --- |
| 2004 | 626.59 | 482.51 | 653.07 | 728.22 |
| 2005 | 748.61 | 534.41 | 771.44 | 905.38 |
| 2006 | 728.51 | 482.48 | 754.71 | 899.64 |
| 2007 | 773.12 | 533.64 | 801.46 | 954.61 |
| 2008 | 1564.58 | 901.49 | 1612.89 | 1524.75 |
| 2009 | 1111.08 | 604.43 | 1216.54 | 1022.69 |
| 2010 | 951.47 | 544.49 | 1083.41 | 981.11 |

Therefore, the fertilizer cost can be calculated based on Equation (S4):

|  | (S4) |
| --- | --- |

Other costs of conventional farming, like seeds, tools, *etc*, are calculated to cost between 4500 and 6500 PhP per hectare per season, based on data from the study site. We calculate these costs using Equation (S5):

|  | (S5) |
| --- | --- |

where the previous other cost is the average number of the last 3 seasons.

Based on Equations (S3)–(S5), the agent can calculate his/her expected cost for the following rice season if he/she chooses conventional farming. Then he/she needs to calculate his/her expected income. First he/she calculates the potential yield for the next season using Equation (S6):

|  | (S6) |
| --- | --- |

where previous yield is the average number of the last 3 seasons.

The farmer cannot sell the entire yield because of the consumption form the family members. Rice consumption in the Philippines averages about 283 grams per capita per day [6]. Data shows that there is no direct relationship between per capita rice consumption and family income, and rice consumption per capita ranges from 250 to 350 grams per day. Therefore, the amount of rice sold by a farmer agent can be calculated as Equation (S7):

|  | (S7) |
| --- | --- |

where daily capita is the daily rice consumption drawn from a uniform distribution between 250 and 350, and 160 represents the numbers of days in a farming season. Potential income derived from the sale of rice can be calculated based on Equation (S8):

|  | (S8) |
| --- | --- |

where *α* is the percentage of income left after other household expenses, and previous price is the average rice price of the last 3 seasons. Based on the data collected from Negros Oriental province [6], the average value of *α* is 0.35, which is set as the default value (Table S3).

**Table S3.** Cost and profit breakdowns of rice farming.

|  | **2002** | **2003** | **2004** | **2005** | **2006** | **2007** | **2008** | **2009** | **2010** |
| --- | --- | --- | --- | --- | --- | --- | --- | --- | --- |
| Total costs | 21,864 | 22,874 | 25,256 | 27,925 | 28,622 | 30,580 | 37,197 | 37,716 | 39,300 |
| Net returns | 5619 | 6917 | 7941 | 9498 | 9912 | 12,068 | 16,073 | 12,608 | 14,559 |
| Net profit-cost ratio | 0.26 | 0.3 | 0.31 | 0.34 | 0.35 | 0.39 | 0.43 | 0.33 | 0.37 |
| Farmgate Price in Pesos Per Kilogram | 8.62 | 8.84 | 9.45 | 10.43 | 10.46 | 11.22 | 14.13 | 14.76 | 14.87 |

The farmer agent now needs to calculate expected costs and profits from organic farming, following similar procedures described above. Each hectare of organically farmed land will need 900 kilograms of organic fertilizer [7]. Bags of organic fertilizer (50 kilogram per bag) will cost about 200 PhP, according to data collected from the field site. In the model, we assume that if the farmer’s land area is bigger than one hectare and she has animals (*animal* *availability* = true), then she can compost organic manure to meet her fertilizer needs, meaning her fertilizer cost will be zero. As noted above, when a farmer experiments with organic farming, her *patience* will start to count down. When the value of *patience* reaches zero, the farmer agent will compare net profits from conventional and organic methods to see which is more profitable.

After evaluating both conventional and organic options, the agent will be able to decide which farming type to adopt, as described in Figure S2.

**Figure S2.** Decision rule to choose between conventional and organic farming type.

3.3.2. During Each Farming Season

The previous section describes the *estimated* net profit of production which a farmer agent uses to decide between conventional and organic methods. During the model time step, the *actual* simulated net profit is calculated as described below, for conventional farmers:

*Labor cost* is calculated using Equation (S9):

|  | (S9) |
| --- | --- |

where each labor will cost between 7000 to 12000 PhP per season, according to data from the field site. Chemical *fertilizer cost* can be calculated using Equation (S4). The cost of other inputs varies every season, which can be calculated using Equation (S10):

|  | (S10) |
| --- | --- |

where the cost of other inputs (seed, tools, *etc.*) follows a uniform distribution ranging from 4500 to 6500 PhP per hectare. As described above, the optimal *fertilizer amount* is estimated to be 64.75 kilograms of Nitrogen per ha. For farmers who cannot afford to buy the optimal amount of fertilizer, their *fertilizer amount* can be calculated using Equation (S11):

|  | (S11) |
| --- | --- |

For farmers who can afford more fertilizer, they tend to buy more to secure the yield. We assume the maximum amount is 1.5 times to the estimated fertilizer amount in need. Therefore, their afford fertilizer amount can be calculated using Equation (S12):

|  | (S12) |
| --- | --- |

The total cost of production is found by adding up the *labor cost*, *fertilizer cost* and *other input* cost. The total *yield* can be calculated based on the following equation:

|  | (S13) |
| --- | --- |

where the yield (kilogram per ha) follows a Michaelis–Menten curve based on data collected from the field site, and seasoncount describes how many seasons have passed since the beginning of the simulation. Based on data collected from Negros Oriental province, rice yields increase an average of 1.35% per year, or 0.45% per season (Table S4).

We assume that all rice is sold at a similar price in local markets. Therefore, the income generated from selling rice can be calculated following Equation (S14):

|  | (S14) |
| --- | --- |

where rice price is uniformly distributed between 10.43 to 14.87 php per kilogram (Table S3).

**Table S4.** Production and yield of palay (Rice) (from countrystat database).

|  | **Total Production (ton)** | **Land Use (Hectare)** | **Yield(ton/ha)** |
| --- | --- | --- | --- |
| 1994 | 10,538,054 | 3,651,530 | 2.885928 |
| 1995 | 10,540,649 | 3,758,691 | 2.80434 |
| 1996 | 11,283,568 | 3,951,136 | 2.855778 |
| 1997 | 11,268,963 | 3,842,270 | 2.932892 |
| 1998 | 8,554,824 | 3,170,042 | 2.698647 |
| 1999 | 1,178,6625 | 3,999,839 | 2.946775 |
| 2000 | 1,238,9412 | 4,038,085 | 3.06814 |
| 2001 | 1,295,4870 | 4,065,441 | 3.186584 |
| 2002 | 1,327,0653 | 4,046,318 | 3.279686 |
| 2003 | 1,349,9884 | 4,006,421 | 3.369562 |
| 2004 | 1,449,6784 | 4,126,645 | 3.512971 |
| 2005 | 1,460,3005 | 4,070,421 | 3.587591 |
| 2006 | 1,532,6706 | 4,159,930 | 3.684366 |
| 2007 | 1,624,0194 | 4,272,889 | 3.800753 |
| 2008 | 1,681,5548 | 4,459,977 | 3.770322 |
| 2009 | 1,626,6417 | 4,532,310 | 3.58899 |
| 2010 | 15,772,319 | 4,354,161 | 3.622355 |

The income from organic farming is also calculated using Equation (S14) above. The cost of other inputs for organic farming is lower than for conventional farming, ranging from 500 to 1500 Php/ha. We assume that when a farmer agent switches from conventional farming to organic farming, his yield will fall by 50 percent [8], which means the yield per hectare for the first following season after the change will range from 1500 to 2100 kilograms per hectare. If the farmer keeps choosing organic farming, the yield will increase 5% for each season.

Each time step, a risk value is derived randomly from a uniform distribution between 0 and 1. If a farmer agent’s risk attitude is lower than this risk value, the agent does not change back to conventional methods even if the agent determines them to be more profitable.

References

1. Giske, J.; Eliassen, S.; Fiksen, Ø.; Jakobsen, P.J.; Aksnes, D.L.; Jørgensen, C.; Mangel, M. Effects of the emotion system on adaptive behavior. *Am. Nat.* **2013**, *182*, 689–703.
2. Grimm, V.; Berger, U.; DeAngelis, D.L.; Polhill, J.G.; Giske, J.; Railsback, S.F. The ODD protocol: A review and first update. *Ecol. Modell.* **2010**, *221*, 2760–2768.
3. Hamill, L.; Gilbert, N. Social circles: A simple structure for agent-based social network models. *J. Artif. Soc. Soc. Simul.* **2009**, *12*, 3.
4. Hogeschool Utrecht School of Education. The Philippines: Demographic Statistics. 2000. http://www.philippines.hvu.nl/facts2.htm (accessed on 10 June 2013).
5. Population Institute of the East-West Center. Poverty in the Philippines: The Impact of Family Size. 1992. Available online: http://www.eastwestcenter.org/fileadmin/stored/pdfs/p&p021.pdf (accessed on 10 June 2013).
6. Negros Oriental Province. Provincial Statistics. 2006. Available online: http://countrystat.bas.gov.ph/
   index.asp?cont=tables&pageid=main/DETAILS/1_PN/1_CROPS/1_CROPS.xml (accessed on 30 May 2013).
7. Mamaril, C.P. Organic Fertilizer in Rice: Myths and Facts. Agriculture (Philippines). 2004. Available online: http://www.asiarice.org/sections/chapters/philippines/All%20About%20Rice%
   20Issue%20No%201%20final.pdf (accessed on 12 July 2013).
8. Sullivan, P. Organic Rice Production. Appropriate Technology Transfer for Rural Areas. Natl. Ctr. for Appropriate Technol., Butte, MT, USA, 2003. Available online: Available at http://attra. ncat.org/
   attra-pub/PDF/rice.pdf (verified 21 April 2011).

© 2015 by the authors; licensee MDPI, Basel, Switzerland. This article is an open access article distributed under the terms and conditions of the Creative Commons Attribution license (http://creativecommons.org/licenses/by/4.0/).
